# Supplementary material
Source: HighWire-hosted journal article supplement (https://fn.bmjjournals.com/content/suppl/2006/04/18/adc.2005.081265)
Supplement: 913f169_t2__table.pdf [file 913f169_t2__table.pdf]

Table 2 Milk expression data according to randomised spray

E

|                                           | Oxytocin <sup>♠</sup><br>spray <sup>♠</sup><br>(n=25) | Placebo <sup>♠</sup><br>spray <sup>♠</sup><br>(n=23) | p Value | Historical <sup>♠</sup><br>control <sup>♠</sup><br>data (n=17) |
|-------------------------------------------|-------------------------------------------------------|------------------------------------------------------|---------|----------------------------------------------------------------|
| Day started                               | 2 (0.8)                                               | 2 (0.4)                                              | 0.9     |                                                                |
| expressing <sup>†</sup>                   |                                                       |                                                      |         |                                                                |
| Daily milk<br>production (g) <sup>‡</sup> |                                                       |                                                      |         |                                                                |
| Day 1                                     | 6.79                                                  | 4.19                                                 | 0.35*   |                                                                |
| Day 2                                     | 27.0                                                  | 13.2                                                 | 0.045*  | 10.1                                                           |
| Day 3                                     | 60.1                                                  | 62.2                                                 | 0.99*   | 29.3                                                           |
| Day 4                                     | 119.0                                                 | 177.7                                                | 0.75*   | 107.8                                                          |
| Day 5                                     | 130.2                                                 | 244.2                                                | 0.12*   | 221.4                                                          |
| Time spent<br>expressing milk<br>(min)    |                                                       |                                                      |         |                                                                |
| Day 1                                     | 60 (40, 90)                                           | 60 (51, 70)                                          |         |                                                                |
| Day 2                                     | 90 (78, 106)                                          | 100 (83, 125)                                        |         |                                                                |
| Day 3                                     | 95 (63, 105)                                          | 100 (83, 128)                                        |         |                                                                |
| Day 4                                     | 90 (65, 105)                                          | 105 (68, 138)                                        |         |                                                                |
| Day 5                                     | 89 (58, 105)                                          | 100 (75, 147)                                        |         |                                                                |
| Weight expressed<br>per minute (g)        |                                                       |                                                      |         |                                                                |
| Day 1                                     | 0.06 (0, 0.71)                                        | 0.02 (0, 0.27)                                       |         |                                                                |

|       | Oxytocin <sup>‡</sup><br>spray <sup>‡</sup><br>(n=25) | Placebo <sup>‡</sup><br>spray <sup>‡</sup><br>(n=23) | p Value | Historical <sup>‡</sup><br>control <sup>‡</sup><br>data (n=17) |
|-------|-------------------------------------------------------|------------------------------------------------------|---------|----------------------------------------------------------------|
| Day 2 | 0.23 (0.05, 2.24)                                     | 0.11 (0.03, 0.79)                                    |         |                                                                |
| Day 3 | 1.11 (0.46, 3.76)                                     | 0.72 (0.18, 2.36)                                    |         |                                                                |
| Day 4 | 2.57 (0.59, 4.19)                                     | 1.61 (1.15, 2.97)                                    |         |                                                                |
| Day 5 | 3.0 (1, 4.3)                                          | 2.1 (1.35, 4.28)                                     |         |                                                                |

Results are median (25th, 75th centiles) unless otherwise stated.

\*p Values from repeated measures analysis of variance with Bonferroni correction.

†Mean (SD).

‡Geometric mean.
